# Supplementary material for: Effects of aging on the quality of roasted sesame-like flavor Daqu
Source: PubMed Central journal article supplement (PMC7098102; doi:10.1186/s12866-020-01745-3), 2020-03-26
Supplement: 12866_2020_1745_MOESM1_ESM.pdf [file 12866_2020_1745_MOESM1_ESM.pdf]

## Table

**Table S1** Volatile compounds identified in RSF *Daqu* samples.

| Code                 | Compounds                               | Concentration (mg/kg)       |                             |                            |                             |
|----------------------|-----------------------------------------|-----------------------------|-----------------------------|----------------------------|-----------------------------|
|                      |                                         | A0                          | A1                          | A2                         | A3                          |
| <b>Alcohols (6)</b>  |                                         |                             |                             |                            |                             |
| V1                   | 1-Octen-3-ol                            | 0.0215±0.0028 <sup>b</sup>  | 0.0110±0.0027 <sup>a</sup>  | 0.0398±0.0010 <sup>c</sup> | 0.0386±0.0007 <sup>c</sup>  |
| V2                   | Phenylethyl alcohol                     | 0.2298±0.0309 <sup>a</sup>  | 0.3928±0.0719 <sup>b</sup>  | 0.3783±0.0390 <sup>b</sup> | 0.4081±0.0031 <sup>b</sup>  |
| V3                   | Ledol                                   | 0.1085±0.0150 <sup>a</sup>  | 0.1135±0.0274 <sup>ab</sup> | 0.1368±0.0008 <sup>b</sup> | 0.1327±0.0050 <sup>b</sup>  |
| V4                   | 1-Pentanol, 4-methyl-                   | 0.0147±0.0012 <sup>a</sup>  | 0.0188±0.0011 <sup>bc</sup> | 0.0184±0.0001 <sup>b</sup> | 0.0204±0.0028 <sup>bc</sup> |
| V5                   | 2,2,4-Trimethyl-1,3-pentanediol         | 0.0260±0.0031 <sup>c</sup>  | 0.0195±0.0027 <sup>b</sup>  | 0.0148±0.0005 <sup>a</sup> | 0.0136±0.0012 <sup>a</sup>  |
| V6                   | 2,4,7,9-Tetramethyl-5-decyn-4,7-diol    | nd <sup>*</sup>             | nd                          | 0.0161±0.0001 <sup>a</sup> | 0.0156±0.0005 <sup>a</sup>  |
| <b>Σ</b>             |                                         | <b>0.4005</b>               | <b>0.5556</b>               | <b>0.6042</b>              | <b>0.6290</b>               |
| <b>Esters (7)</b>    |                                         |                             |                             |                            |                             |
| V7                   | p-Toluic acid, 2-ethylhexyl ester       | 0.0095±0.0003 <sup>b</sup>  | 0.0080±0.0015 <sup>b</sup>  | 0.0054±0.0010 <sup>a</sup> | 0.0061±0.0001 <sup>a</sup>  |
| V8                   | Phthalic acid, hept-4-yl isobutyl ester | 0.0661±0.0086 <sup>a</sup>  | 0.0741±0.0120 <sup>a</sup>  | 0.0740±0.0011 <sup>a</sup> | 0.0728±0.0006 <sup>a</sup>  |
| V9                   | Dibutyl phthalate                       | 0.1101±0.0203 <sup>a</sup>  | 0.1189±0.0063 <sup>a</sup>  | 0.1375±0.0113 <sup>a</sup> | 0.1228±0.0096 <sup>a</sup>  |
| V10                  | Hexadecanoic acid, ethyl ester          | 0.0631±0.0183 <sup>ab</sup> | 0.0562±0.0061 <sup>a</sup>  | 0.0668±0.0008 <sup>b</sup> | 0.0608±0.0077 <sup>a</sup>  |
| V11                  | 9,12-Octadecadienoic acid, ethyl ester  | 0.0387±0.0130 <sup>ab</sup> | 0.0313±0.0027 <sup>a</sup>  | 0.0390±0.0010 <sup>b</sup> | 0.0413±0.0042 <sup>b</sup>  |
| V12                  | (E)-9-Octadecenoic acid ethyl ester     | 0.0456±0.0178 <sup>ab</sup> | 0.0266±0.0072 <sup>a</sup>  | 0.0418±0.0076 <sup>b</sup> | 0.0359±0.0008 <sup>b</sup>  |
| V13                  | 2-Propanol, 1-chloro-, phosphate (3:1)  | 0.0082±0.0020               | nd                          | nd                         | nd                          |
| <b>Σ</b>             |                                         | <b>0.3413</b>               | <b>0.3151</b>               | <b>0.3645</b>              | <b>0.3397</b>               |
| <b>Aldehydes (6)</b> |                                         |                             |                             |                            |                             |
| V14                  | Hexanal                                 | 0.0378±0.0079 <sup>a</sup>  | 0.1157±0.0194 <sup>b</sup>  | 0.1358±0.0156 <sup>b</sup> | 0.1218±0.0043 <sup>b</sup>  |
| V15                  | Benzaldehyde                            | 0.0406±0.0032 <sup>a</sup>  | 0.0530±0.0194 <sup>ab</sup> | 0.0595±0.0011 <sup>b</sup> | 0.0590±0.0005 <sup>b</sup>  |
| V16                  | Benzeneacetaldehyde                     | 0.0628±0.0067 <sup>a</sup>  | 0.0700±0.0026 <sup>a</sup>  | 0.0657±0.0022 <sup>a</sup> | 0.0673±0.0010 <sup>a</sup>  |
| V17                  | 2-Octenal, (E)-                         | 0.0249±0.0063 <sup>b</sup>  | 0.0208±0.0002 <sup>b</sup>  | 0.0159±0.0006 <sup>a</sup> | 0.0151±0.0005 <sup>a</sup>  |
| V18                  | Nonanal                                 | 0.0287±0.0054 <sup>b</sup>  | 0.0276±0.0036 <sup>b</sup>  | 0.0158±0.0003 <sup>a</sup> | 0.0149±0.0009 <sup>a</sup>  |
| V19                  | 2-Nonenal, (E)-                         | 0.0402±0.0214 <sup>b</sup>  | 0.0126±0.0032 <sup>a</sup>  | 0.0170±0.0014 <sup>a</sup> | 0.0152±0.0010 <sup>a</sup>  |

|                                                 |                                     |                             |                             |                             |                             |
|-------------------------------------------------|-------------------------------------|-----------------------------|-----------------------------|-----------------------------|-----------------------------|
| $\Sigma$                                        |                                     | <b>0.2350</b>               | <b>0.2997</b>               | <b>0.3097</b>               | <b>0.2933</b>               |
| <b><i>Benzodiazepines (3)</i></b>               |                                     |                             |                             |                             |                             |
| V20                                             | Naphthalene, 2-methyl-              | 0.0217±0.0003 <sup>b</sup>  | 0.0153±0.0028 <sup>a</sup>  | 0.0152±0.0003 <sup>a</sup>  | 0.0144±0.0009 <sup>a</sup>  |
| V21                                             | Benzene, 4-ethenyl-1,2-dimethoxy-   | nd                          | 0.012±0.0031                | nd                          | nd                          |
| V22                                             | Naphthalene, 1,7-dimethyl-          | 0.0302±0.0025 <sup>b</sup>  | 0.0242±0.0096 <sup>b</sup>  | 0.0078±0.0001 <sup>a</sup>  | 0.0076±0.0003 <sup>a</sup>  |
| $\Sigma$                                        |                                     | <b>0.0519</b>               | <b>0.0515</b>               | <b>0.0230</b>               | <b>0.0220</b>               |
| <b><i>Nitrogen-containing compounds (1)</i></b> |                                     |                             |                             |                             |                             |
| V23                                             | Pyrazine, tetramethyl-              | 0.0199±0.0027 <sup>a</sup>  | 0.0790±0.0195 <sup>d</sup>  | 0.0339±0.0096 <sup>b</sup>  | 0.0577±0.0059 <sup>cd</sup> |
| <b><i>Ketones (5)</i></b>                       |                                     |                             |                             |                             |                             |
| V24                                             | Acetophenone                        | 0.0084±0.0022               | nd                          | nd                          | nd                          |
| V25                                             | 2-Undecanone                        | 0.0170±0.0038 <sup>b</sup>  | 0.0128±0.0033 <sup>ab</sup> | 0.0101±0.0008 <sup>a</sup>  | 0.0088±0.0011 <sup>a</sup>  |
| V26                                             | 2-Pentadecanone, 6,10,14-trimethyl- | nd                          | 0.0072±0.0005 <sup>a</sup>  | 0.0069±0.0002 <sup>a</sup>  | 0.0071±0.0005 <sup>a</sup>  |
| V27                                             | 2(3H)-Furanone, dihydro-5-pentyl-   | 0.0136±0.0004 <sup>b</sup>  | nd                          | 0.0089±0.0005 <sup>a</sup>  | 0.0085±0.0001 <sup>a</sup>  |
| V28                                             | 2-Dodecen-1-yl(-)succinic anhydride | nd                          | 0.0092±0.0044               | nd                          | nd                          |
| $\Sigma$                                        |                                     | <b>0.0390</b>               | <b>0.0292</b>               | <b>0.0259</b>               | <b>0.0244</b>               |
| <b><i>Phenols (1)</i></b>                       |                                     |                             |                             |                             |                             |
| V29                                             | 2-Methoxy-4-vinylphenol             | 0.0381±0.0084 <sup>b</sup>  | nd                          | 0.0199±0.0034 <sup>a</sup>  | 0.0181±0.0008 <sup>a</sup>  |
| <b><i>Alkane (4)</i></b>                        |                                     |                             |                             |                             |                             |
| V30                                             | Tetradecane                         | 0.0269±0.0025 <sup>c</sup>  | 0.0217±0.0029 <sup>b</sup>  | 0.0113±0.0006 <sup>a</sup>  | 0.0108±0.0002 <sup>a</sup>  |
| V31                                             | Tetradecane, 3-methyl-              | 0.0219±0.0016 <sup>b</sup>  | 0.0208±0.0032 <sup>b</sup>  | 0.0044±0.0002 <sup>a</sup>  | 0.0045±0.0001 <sup>a</sup>  |
| V32                                             | Pentadecane                         | 0.0265±0.0024 <sup>b</sup>  | 0.0266±0.0053 <sup>b</sup>  | 0.0115±0.0004 <sup>a</sup>  | 0.0109±0.0004 <sup>a</sup>  |
| V33                                             | Hexadecane                          | 0.0113±0.0010 <sup>bc</sup> | 0.0132±0.0012 <sup>c</sup>  | 0.0099±0.0013 <sup>ab</sup> | 0.0084±0.0008 <sup>a</sup>  |
| $\Sigma$                                        |                                     | <b>0.0866</b>               | <b>0.0823</b>               | <b>0.0371</b>               | <b>0.0346</b>               |
| <b><i>Alkene (1)</i></b>                        |                                     |                             |                             |                             |                             |
| V34                                             | Caryophyllene                       | nd                          | nd                          | 0.0207±0.0006 <sup>a</sup>  | 0.0236±0.0047 <sup>b</sup>  |

Note: Same letters in the column do not differ significantly at 5% probability by Tukey test. A0, at the beginning of aging; A1, after one month of aging; A2, after two months of aging; A3, after three months of aging. \* nd, not detected.
