# Supplementary material for: Effects of aging on the quality of roasted sesame-like flavor Daqu
Source: PubMed Central journal article supplement (PMC7098102; doi:10.1186/s12866-020-01745-3), 2020-03-26
Supplement: 12866_2020_1745_MOESM2_ESM.pdf [file 12866_2020_1745_MOESM2_ESM.pdf]

## **Figure legends**

**Fig. S1.** The clustering analysis was performed using UPGMA, which is a type of hierarchical clustering method based on unweighted UniFrac distance metrics, and showed the relationship of the prokaryotic communities in the four samples (A0, at the beginning of aging; A1, after one month of aging; A2, after two months of aging; A3, after three months of aging).

**Fig. S2.** PCoA analysis of the prokaryotic communities in the four samples (A0, at the beginning of aging; A1, after one month of aging; A2, after two months of aging; A3, after three months of aging). The first two principal components (PC1 and PC2) can explain 80.96% of the data variance.

**Fig. S3.** The clustering analysis was performed using UPGMA, which is a type of hierarchical clustering method based on unweighted UniFrac distance metrics, and showed the relationship of the eukaryotic communities in the four samples (A0, at the beginning of aging; A1, after one month of aging; A2, after two months of aging; A3, after three months of aging).

**Fig. S4.** PCoA analysis of the eukaryotic communities in the four samples (A0, at the beginning of aging; A1, after one month of aging; A2, after two months of aging; A3, after three months of aging). The first two principal components (PC1 and PC2) can explain 74.88% of the data variance

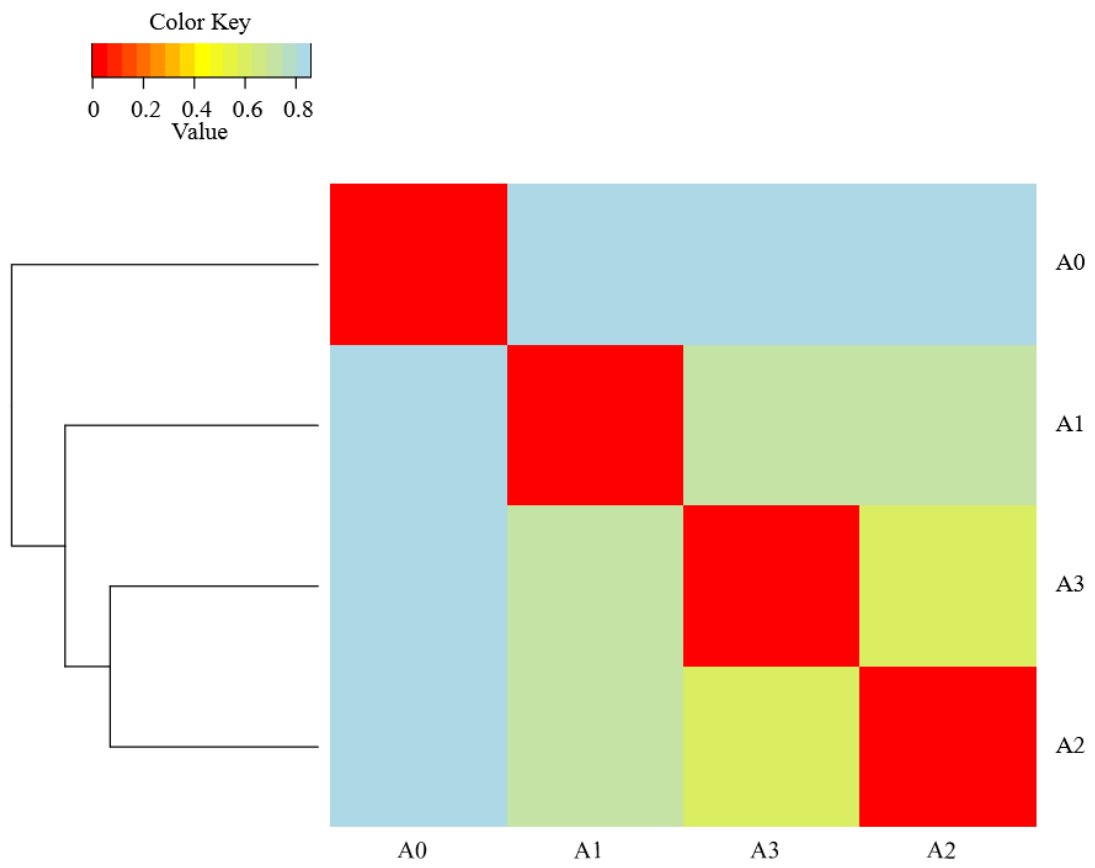

**Fig. S1**

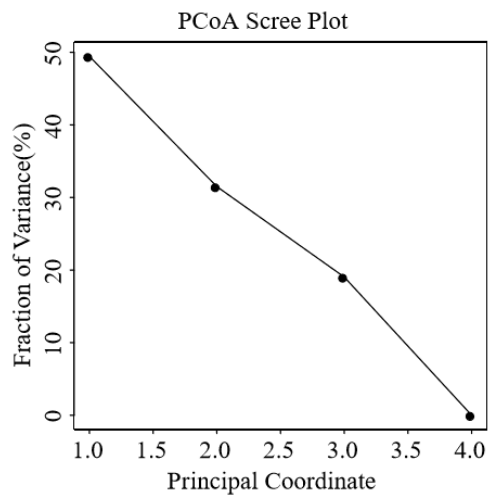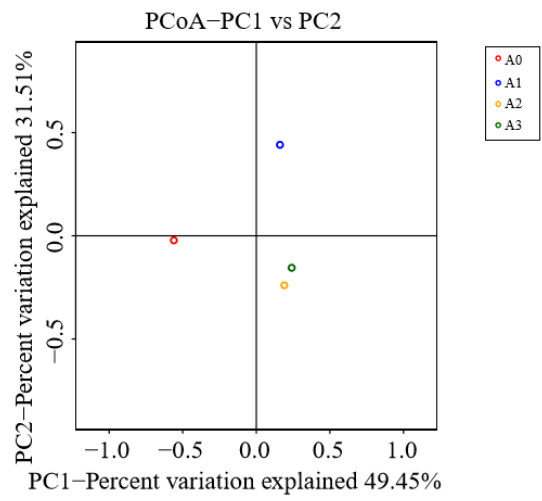

**Fig. S2**

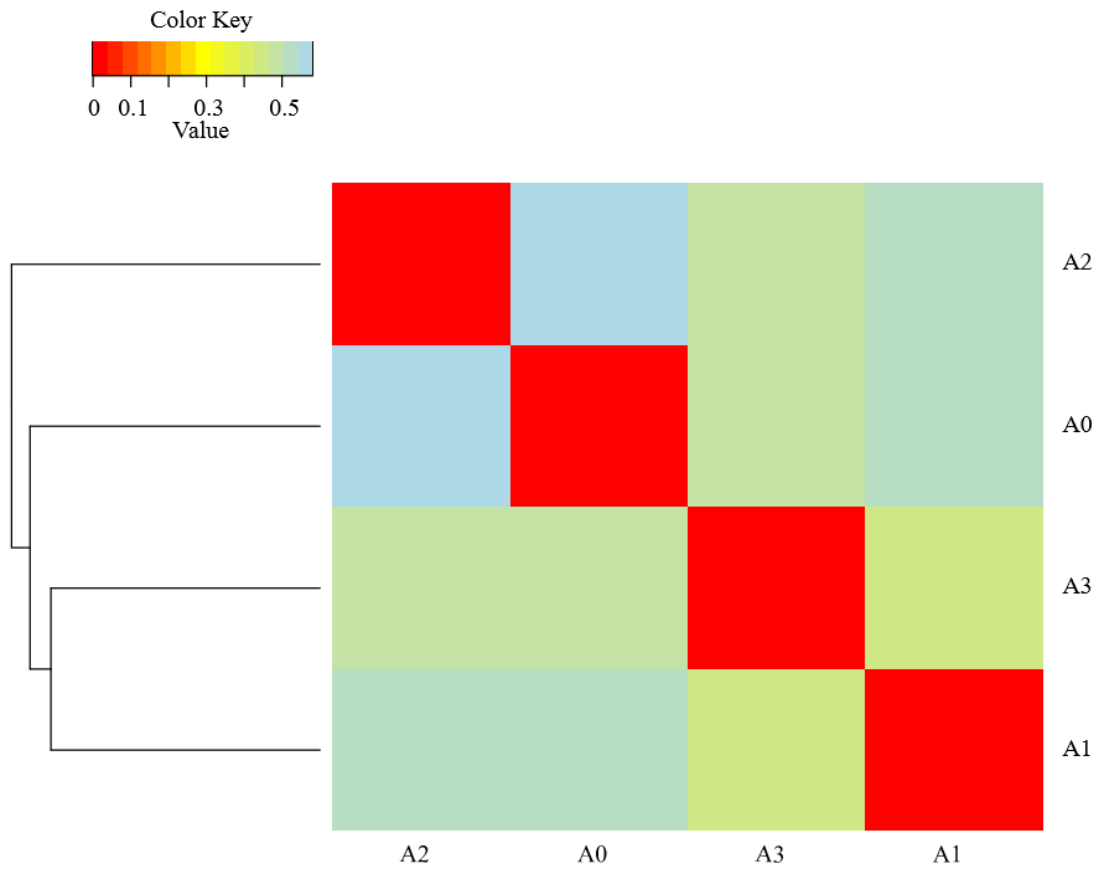

**Fig. S3**

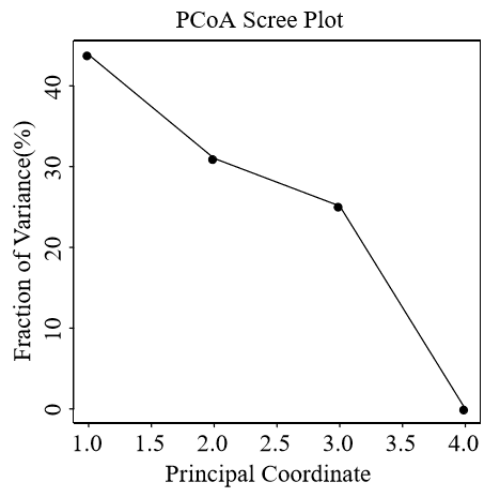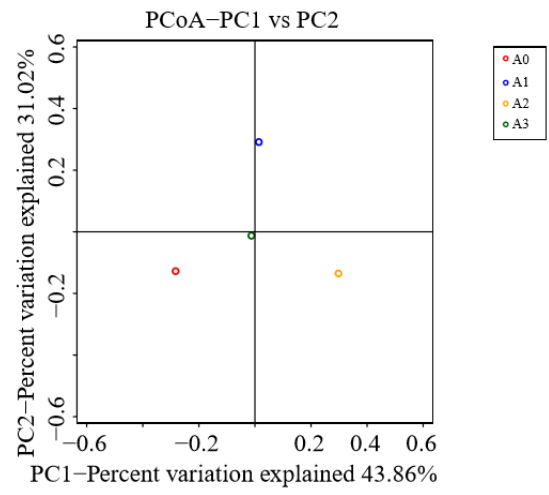

Fig. S4
